# Supplementary material for: Compositional distinction of gut microbiota between Han Chinese and Tibetan populations with liver cirrhosis
Source: PeerJ. 2021 Sep 15;9:e12142. doi: 10.7717/peerj.12142 (PMC8449536; doi:10.7717/peerj.12142)
Supplement: Supplemental Information 3 [file peerj-09-12142-s003.xlsx]

## Sheet: Sheet1
Table S2. α-diversity of gut microbiota in faeces samples from all sample
Sample ID	chao1	good's coverage	observed species	shannon	simpson
THC1	80.9574	0.99847	40.9	1.7408	0.591569
THC2	228.479	0.996341	179.7	4.13758	0.857233
THC3	335.337	0.994635	261.4	5.25361	0.948491
THC4	377.31	0.993313	281.1	4.60949	0.882252
THC5	359.548	0.994712	289	5.49288	0.955056
THC6	292.604	0.99565	232.2	4.64256	0.899908
THC7	386.627	0.994051	292	4.85379	0.857675
THC8	462.044	0.992367	365.7	5.61591	0.949455
THC9	364.613	0.99435	296	5.58776	0.948277
THC10	424.173	0.992905	320.6	4.95666	0.88938
HHC1	465.008	0.992667	376.3	5.39068	0.932119
HHC2	552.212	0.990968	392.9	5.50782	0.942655
HHC3	457.364	0.99269	352.8	5.48504	0.942579
HHC4	429.9	0.992959	323.9	5.03856	0.92538
HHC5	387.815	0.992629	290.2	3.97696	0.814555
HHC6	448.481	0.993613	371.6	5.85409	0.954243
HHC7	489.317	0.992214	389.7	5.76497	0.944176
HHC8	542.833	0.990822	367.1	5.45278	0.934564
HHC9	431.342	0.993274	360	5.21921	0.905692
TLC1	372.946	0.994435	300.6	5.56083	0.947381
TLC2	220.58	0.996956	175.4	4.56159	0.910261
TLC3	206.744	0.995749	98.2	2.02417	0.656565
TLC4	700.044	0.994489	668.3	7.33475	0.981289
TLC5	169.743	0.997402	133.7	4.40078	0.92353
TLC6	419.328	0.993374	337.5	5.4426	0.947765
TLC7	382.982	0.994335	318.8	6.22576	0.975898
TLC8	349.646	0.994889	278.2	5.55622	0.952955
TLC9	310.539	0.995434	251	5.11247	0.930938
TLC10	475.323	0.992967	376.1	6.38061	0.972943
TLC11	402.292	0.994005	324.3	5.84671	0.95736
TLC12	314.965	0.995035	243.4	4.21064	0.810895
TLC13	123.3	0.998017	91.8	3.73032	0.884132
TLC14	304.704	0.995434	254.2	5.18787	0.934883
TLC15	383.066	0.994727	316.3	6.00486	0.970157
TLC16	393.227	0.99372	299.6	5.11806	0.928152
TLC17	298.307	0.994842	226.7	4.9923	0.938494
TLC18	572.728	0.991337	471.8	6.06439	0.938135
TLC19	204.625	0.997479	170.6	4.77098	0.912857
TLC20	298.715	0.99548	235	4.77603	0.921183
HLC1	499.792	0.992437	435	6.08473	0.953685
HLC2	467.702	0.993336	387.9	6.02286	0.944463
HLC3	522.641	0.992575	424.6	6.18981	0.954631
HLC4	537.309	0.992198	445	6.2712	0.960046
HLC5	453.527	0.993221	373.6	5.77746	0.949411
HLC6	384.405	0.994135	323.3	4.78511	0.868311
HLC7	352.338	0.993613	258.4	4.25535	0.902263
HLC8	526.612	0.991214	383.4	5.63288	0.951213
HLC9	442.909	0.993559	374.3	5.98435	0.94633
HLC10	472.01	0.992852	396.9	5.93558	0.948596
HLC11	540.023	0.991614	454.7	6.27827	0.964944
HLC12	513.029	0.992214	414.2	5.88762	0.953976
HLC13	501.357	0.992483	407	5.9789	0.95464
HLC14	534.548	0.991776	438.8	6.22168	0.961147
HLC15	442.526	0.994604	385.7	6.07501	0.945358
HLC16	486.972	0.99206	387.4	4.66957	0.803526
