# Supplementary material for: Compositional distinction of gut microbiota between Han Chinese and Tibetan populations with liver cirrhosis
Source: PeerJ. 2021 Sep 15;9:e12142. doi: 10.7717/peerj.12142 (PMC8449536; doi:10.7717/peerj.12142)
Supplement: Supplemental Information 24 [file peerj-09-12142-s024.xlsx]

## Sheet: Contact Info and Instructions
	Instructions:
	Each column that has a red triangle in the upper-right corner has a comment that can be displayed if you hover over the header.
	Some column headers have hyperlinks to NCBI webpages.
	The YELLOW columns have drop-down menues that allow you to select from a controlled vocabulary. Once specified for one row, these values can be copied-and-pasted down.
	You must save spreadsheet under second tab (SRA_data) as a TSV (tab-delimited file) to upload the TSV file for the SRA metadata tab.
	If you created project previously, provide accession in the form of PRJNA# in the column bioproject_accession.
	If you just created project in the SRA wizard, leave the column bioproject_accession empty.
	If you created samples previously, provide accessions in the form of SAMN# in the column sample_accession.
	Each row in the template represents a sequencing library with a unique combination of sample + library + sequencing strategy + layout + instrument model. Each row should have a unique library_id that is short and meaningful (like an ID you might use in lab).
	When libraries are indeed identical (same combination of sample + library + strategy + layout + instrument model), all files should be placed in the same row To do this simply enter the file names consecutively in the same row by adding more columns with headers filename2, filename3, etc…. PAIRED files must always be listed in the same row.
	Provide exact file names (including extensions) in the filename columns.
	File names must be unique.
	red triangles indicate pop-up comments for that field	required for ALL data types	required for aligned data	paired-end data only
	Many of the columns also have data checks - if you received a warning, please verify that you have entered a value from the drop-down menu. Example Below.
	NOTE: There are data checks and autocomplete features in this spreadsheet that are not compatible with Libre- and Open-Office. If you use one of these suites, please manually consult the platform and instrument information on the last page.
	Example Drop Down Menu
	Helpful Hyperlinks:
	SRA submission overview:	http://www.ncbi.nlm.nih.gov/sra/docs/submit/
	SRA submission in Submission Portal:	http://www.ncbi.nlm.nih.gov/sra/docs/submitportal/
	You must save spreadsheet under second tab (SRA_data) as a TSV (tab-delimited file) to upload the TSV file for the SRA metadata tab.

## Sheet: SRA_data
biosample_accession	library_ID	title	library_strategy	library_source	library_selection	library_layout	platform	instrument_model	design_description	filetype	filename	filename2	filename3	filename4	assembly	fasta_file
SAMN14053719	1	TLC1	AMPLICON	OTHER	PCR	paired	ILLUMINA	Illumina MiSeq	common method	fastq	TLC1.clean.fastq
SAMN14054047	2	TLC2	AMPLICON	OTHER	PCR	paired	ILLUMINA	Illumina MiSeq	common method	fastq	TLC2.clean.fastq
SAMN14054174	3	TLC3	AMPLICON	OTHER	PCR	paired	ILLUMINA	Illumina MiSeq	common method	fastq	TLC3.clean.fastq
SAMN14054175	4	TLC4	AMPLICON	OTHER	PCR	paired	ILLUMINA	Illumina MiSeq	common method	fastq	TLC4.clean.fastq
SAMN14054198	5	TLC5	AMPLICON	OTHER	PCR	paired	ILLUMINA	Illumina MiSeq	common method	fastq	TLC5.clean.fastq
SAMN14054259	6	TLC6	AMPLICON	OTHER	PCR	paired	ILLUMINA	Illumina MiSeq	common method	fastq	TLC6.clean.fastq
SAMN14054837	7	TLC7	AMPLICON	OTHER	PCR	paired	ILLUMINA	Illumina MiSeq	common method	fastq	TLC7.clean.fastq
SAMN14056044	8	TLC8	AMPLICON	OTHER	PCR	paired	ILLUMINA	Illumina MiSeq	common method	fastq	TLC8.clean.fastq
SAMN14056045	9	TLC9	AMPLICON	OTHER	PCR	paired	ILLUMINA	Illumina MiSeq	common method	fastq	TLC9.clean.fastq
SAMN14056234	10	TLC10	AMPLICON	OTHER	PCR	paired	ILLUMINA	Illumina MiSeq	common method	fastq	TLC10.clean.fastq
SAMN14056262	11	TLC11	AMPLICON	OTHER	PCR	paired	ILLUMINA	Illumina MiSeq	common method	fastq	TLC11.clean.fastq
SAMN14056718	12	TLC12	AMPLICON	OTHER	PCR	paired	ILLUMINA	Illumina MiSeq	common method	fastq	TLC12.clean.fastq
SAMN14056815	13	TLC13	AMPLICON	OTHER	PCR	paired	ILLUMINA	Illumina MiSeq	common method	fastq	TLC13.clean.fastq
SAMN14056842	14	TLC14	AMPLICON	OTHER	PCR	paired	ILLUMINA	Illumina MiSeq	common method	fastq	TLC14.clean.fastq
SAMN14056879	15	TLC15	AMPLICON	OTHER	PCR	paired	ILLUMINA	Illumina MiSeq	common method	fastq	TLC15.clean.fastq
SAMN14056880	16	TLC16	AMPLICON	OTHER	PCR	paired	ILLUMINA	Illumina MiSeq	common method	fastq	TLC16.clean.fastq
SAMN14056897	17	TLC17	AMPLICON	OTHER	PCR	paired	ILLUMINA	Illumina MiSeq	common method	fastq	TLC17.clean.fastq
SAMN14056936	18	TLC18	AMPLICON	OTHER	PCR	paired	ILLUMINA	Illumina MiSeq	common method	fastq	TLC18.clean.fastq
SAMN14056938	19	TLC19	AMPLICON	OTHER	PCR	paired	ILLUMINA	Illumina MiSeq	common method	fastq	TLC19.clean.fastq
SAMN14056939	20	TLC20	AMPLICON	OTHER	PCR	paired	ILLUMINA	Illumina MiSeq	common method	fastq	TLC20.clean.fastq
SAMN14056975	21	THC1	AMPLICON	OTHER	PCR	paired	ILLUMINA	Illumina MiSeq	common method	fastq	THC1.clean.fastq
SAMN14056978	22	THC2	AMPLICON	OTHER	PCR	paired	ILLUMINA	Illumina MiSeq	common method	fastq	THC2.clean.fastq
SAMN14056977	23	THC3	AMPLICON	OTHER	PCR	paired	ILLUMINA	Illumina MiSeq	common method	fastq	THC3.clean.fastq
SAMN14057018	24	THC4	AMPLICON	OTHER	PCR	paired	ILLUMINA	Illumina MiSeq	common method	fastq	THC4.clean.fastq
SAMN14057020	25	THC5	AMPLICON	OTHER	PCR	paired	ILLUMINA	Illumina MiSeq	common method	fastq	THC5.clean.fastq
SAMN14057049	26	THC6	AMPLICON	OTHER	PCR	paired	ILLUMINA	Illumina MiSeq	common method	fastq	THC6.clean.fastq
SAMN14057050	27	THC7	AMPLICON	OTHER	PCR	paired	ILLUMINA	Illumina MiSeq	common method	fastq	THC7.clean.fastq
SAMN14057051	28	THC8	AMPLICON	OTHER	PCR	paired	ILLUMINA	Illumina MiSeq	common method	fastq	THC8.clean.fastq
SAMN14057157	29	THC9	AMPLICON	OTHER	PCR	paired	ILLUMINA	Illumina MiSeq	common method	fastq	THC9.clean.fastq
SAMN14057156	30	THC10	AMPLICON	OTHER	PCR	paired	ILLUMINA	Illumina MiSeq	common method	fastq	THC10.clean.fastq
SAMN14069767	31	HLC1	AMPLICON	OTHER	PCR	paired	ILLUMINA	Illumina MiSeq	common method	fastq	HLC1.clean.fastq
SAMN14069768	32	HLC2	AMPLICON	OTHER	PCR	paired	ILLUMINA	Illumina MiSeq	common method	fastq	HLC2.clean.fastq
SAMN14069769	33	HLC3	AMPLICON	OTHER	PCR	paired	ILLUMINA	Illumina MiSeq	common method	fastq	HLC3.clean.fastq
SAMN14069770	34	HLC4	AMPLICON	OTHER	PCR	paired	ILLUMINA	Illumina MiSeq	common method	fastq	HLC4.clean.fastq
SAMN14069772	35	HLC5	AMPLICON	OTHER	PCR	paired	ILLUMINA	Illumina MiSeq	common method	fastq	HLC5.clean.fastq
SAMN14069787	36	HLC6	AMPLICON	OTHER	PCR	paired	ILLUMINA	Illumina MiSeq	common method	fastq	HLC6.clean.fastq
SAMN14069788	37	HLC7	AMPLICON	OTHER	PCR	paired	ILLUMINA	Illumina MiSeq	common method	fastq	HLC7.clean.fastq
SAMN14069789	38	HLC8	AMPLICON	OTHER	PCR	paired	ILLUMINA	Illumina MiSeq	common method	fastq	HLC8.clean.fastq
SAMN14069790	39	HLC9	AMPLICON	OTHER	PCR	paired	ILLUMINA	Illumina MiSeq	common method	fastq	HLC9.clean.fastq
SAMN14069791	40	HLC10	AMPLICON	OTHER	PCR	paired	ILLUMINA	Illumina MiSeq	common method	fastq	HLC10.clean.fastq
SAMN14069792	41	HLC11	AMPLICON	OTHER	PCR	paired	ILLUMINA	Illumina MiSeq	common method	fastq	HLC11.clean.fastq
SAMN14069797	42	HLC12	AMPLICON	OTHER	PCR	paired	ILLUMINA	Illumina MiSeq	common method	fastq	HLC12.clean.fastq
SAMN14069798	43	HLC13	AMPLICON	OTHER	PCR	paired	ILLUMINA	Illumina MiSeq	common method	fastq	HLC13.clean.fastq
SAMN14069799	44	HLC14	AMPLICON	OTHER	PCR	paired	ILLUMINA	Illumina MiSeq	common method	fastq	HLC14.clean.fastq
SAMN14069800	45	HLC15	AMPLICON	OTHER	PCR	paired	ILLUMINA	Illumina MiSeq	common method	fastq	HLC15.clean.fastq
SAMN14069801	46	HLC16	AMPLICON	OTHER	PCR	paired	ILLUMINA	Illumina MiSeq	common method	fastq	HLC16.clean.fastq
SAMN14069802	47	HHC1	AMPLICON	OTHER	PCR	paired	ILLUMINA	Illumina MiSeq	common method	fastq	HHC1.clean.fastq
SAMN14069803	48	HHC2	AMPLICON	OTHER	PCR	paired	ILLUMINA	Illumina MiSeq	common method	fastq	HHC2.clean.fastq
SAMN14069814	49	HHC3	AMPLICON	OTHER	PCR	paired	ILLUMINA	Illumina MiSeq	common method	fastq	HHC3.clean.fastq
SAMN14069815	50	HHC4	AMPLICON	OTHER	PCR	paired	ILLUMINA	Illumina MiSeq	common method	fastq	HHC4.clean.fastq
SAMN14069816	51	HHC5	AMPLICON	OTHER	PCR	paired	ILLUMINA	Illumina MiSeq	common method	fastq	HHC5.clean.fastq
SAMN14069817	52	HHC6	AMPLICON	OTHER	PCR	paired	ILLUMINA	Illumina MiSeq	common method	fastq	HHC6.clean.fastq
SAMN14069818	53	HHC7	AMPLICON	OTHER	PCR	paired	ILLUMINA	Illumina MiSeq	common method	fastq	HHC7.clean.fastq
SAMN14069819	54	HHC8	AMPLICON	OTHER	PCR	paired	ILLUMINA	Illumina MiSeq	common method	fastq	HHC8.clean.fastq
SAMN14069820	55	HHC9	AMPLICON	OTHER	PCR	paired	ILLUMINA	Illumina MiSeq	common method	fastq	HHC9.clean.fastq

## Sheet: Library and Platform Terms
Strategy
WGA	Random sequencing of the whole genome following non-pcr amplification
WGS	Random sequencing of the whole genome
WXS	Random sequencing of exonic regions selected from the genome
RNA-Seq	Random sequencing of whole transcriptome
miRNA-Seq	Random sequencing of small miRNAs
WCS	Random sequencing of a whole chromosome or other replicon isolated from a genome
CLONE	Genomic clone based (hierarchical) sequencing
POOLCLONE	Shotgun of pooled clones (usually BACs and Fosmids)
AMPLICON	Sequencing of overlapping or distinct PCR or RT-PCR products
CLONEEND	Clone end (5', 3', or both) sequencing
FINISHING	Sequencing intended to finish (close) gaps in existing coverage
ChIP-Seq	Direct sequencing of chromatin immunoprecipitates
MNase-Seq	Direct sequencing following MNase digestion
DNase-Hypersensitivity	Sequencing of hypersensitive sites, or segments of open chromatin that are more readily cleaved by DNaseI
Bisulfite-Seq	Sequencing following treatment of DNA with bisulfite to convert cytosine residues to uracil depending on methylation status
Tn-Seq	Sequencing from transposon insertion sites
EST	Single pass sequencing of cDNA templates
FL-cDNA	Full-length sequencing of cDNA templates
CTS	Concatenated Tag Sequencing
MRE-Seq	Methylation-Sensitive Restriction Enzyme Sequencing strategy
MeDIP-Seq	Methylated DNA Immunoprecipitation Sequencing strategy
MBD-Seq	Direct sequencing of methylated fractions sequencing strategy
Synthetic-Long-Read
ATAC-seq	Assay for Transposase-Accessible Chromatin (ATAC) strategy is used to study genome-wide chromatin accessibility. alternative method to DNase-seq that uses an engineered Tn5 transposase to cleave DNA and to integrate primer DNA sequences into the cleaved genomic DNA
ChIA-PET	Direct sequencing of proximity-ligated chromatin immunoprecipitates.
FAIRE-seq	Formaldehyde Assisted Isolation of Regulatory Elements. reveals regions of open chromatin
Hi-C	Chromosome Conformation Capture technique where a biotin-labeled nucleotide is incorporated at the ligation junction, enabling selective purification of chimeric DNA ligation junctions followed by deep sequencing
ncRNA-Seq	Capture of other non-coding RNA types, including post-translation modification types such as snRNA (small nuclear RNA) or snoRNA (small nucleolar RNA), or expression regulation types such as siRNA (small interfering RNA) or piRNA/piwi/RNA (piwi-interacting RNA).
RAD-Seq
RIP-Seq	Direct sequencing of RNA immunoprecipitates (includes CLIP-Seq, HITS-CLIP and PAR-CLIP).
SELEX	Systematic Evolution of Ligands by EXponential enrichment
ssRNA-seq	strand-specific RNA sequencing
Targeted-Capture
Tethered Chromatin Conformation Capture
OTHER	Library strategy not listed (please include additional info in the “design description”)
Source
GENOMIC	Genomic DNA (includes PCR products from genomic DNA)
TRANSCRIPTOMIC	Transcription products or non genomic DNA (EST, cDNA, RT-PCR, screened libraries)
METAGENOMIC	Mixed material from metagenome
METATRANSCRIPTOMIC	Transcription products from community targets
SYNTHETIC	Synthetic DNA
VIRAL RNA	Viral RNA
GENOMIC SINGLE CELL
TRANSCRIPTOMIC SINGLE CELL
OTHER	Other, unspecified, or unknown library source material (please include additional info in the “design description”)
Selection
RANDOM	Random selection by shearing or other method
PCR	Source material was selected by designed primers
RANDOM PCR	Source material was selected by randomly generated primers
RT-PCR	Source material was selected by reverse transcription PCR
HMPR	Hypo-methylated partial restriction digest
MF	Methyl Filtrated
CF-S	Cot-filtered single/low-copy genomic DNA
CF-M	Cot-filtered moderately repetitive genomic DNA
CF-H	Cot-filtered highly repetitive genomic DNA
CF-T	Cot-filtered theoretical single-copy genomic DNA
MDA	Multiple displacement amplification
MSLL	Methylation Spanning Linking Library
cDNA	complementary DNA
ChIP	Chromatin immunoprecipitation
MNase	Micrococcal Nuclease (MNase) digestion
DNAse	Deoxyribonuclease (MNase) digestion
Hybrid Selection	Selection by hybridization in array or solution
Reduced Representation	Reproducible genomic subsets, often generated by restriction fragment size selection, containing a manageable number of loci to facilitate re-sampling
Restriction Digest	DNA fractionation using restriction enzymes
5-methylcytidine antibody	Selection of methylated DNA fragments using an antibody raised against 5-methylcytosine or 5-methylcytidine (m5C)
MBD2 protein methyl-CpG binding domain	Enrichment by methyl-CpG binding domain
CAGE	Cap-analysis gene expression
RACE	Rapid Amplification of cDNA Ends
size fractionation	Physical selection of size appropriate targets
Padlock probes capture method	Circularized oligonucleotide probes
other	Other library enrichment, screening, or selection process (please include additional info in the “design description”)
unspecified	Library enrichment, screening, or selection is not specified (please include additional info in the “design description”)
cDNA_oligo_dT
cDNA_randomPriming
Inverse rRNA	depletion of ribosomal RNA by oligo hybridization.
Oligo-dT	enrichment of messenger RNA (mRNA) by hybridization to Oligo-dT.
PolyA	PolyA selection or enrichment for messenger RNA (mRNA); should replace cDNA enumeration.
repeat fractionation	Selection for less repetitive (and more gene rich) sequence through Cot filtration (CF) or other fractionation techniques based on DNA kinetics.
Platforms
_LS454	_LS454	ILLUMINA	HELICOS	ABI_SOLID	COMPLETE_GENOMICS	PACBIO_SMRT	ION_TORRENT	CAPILLARY	OXFORD_NANOPORE	BGISEQ
ABI_SOLID	454 GS	HiSeq X Five	Helicos HeliScope	AB 5500 Genetic Analyzer	Complete Genomics	PacBio RS	Ion Torrent PGM	AB 310 Genetic Analyzer	GridION	BGISEQ-500
BGISEQ	454 GS 20	HiSeq X Ten		AB 5500xl Genetic Analyzer		PacBio RS II	Ion Torrent Proton	AB 3130 Genetic Analyzer	MinION
CAPILLARY	454 GS FLX	Illumina Genome Analyzer		AB 5500x-Wl Genetic Analyzer		PacBio Sequel	Ion Torrent S5 XL	AB 3130xL Genetic Analyzer	PromethION
COMPLETE_GENOMICS	454 GS FLX+	Illumina Genome Analyzer II		AB SOLiD 3 Plus System		PacBio Sequel II	Ion Torrent S5	AB 3500 Genetic Analyzer
HELICOS	454 GS FLX Titanium	Illumina Genome Analyzer IIx		AB SOLiD 4 System				AB 3500xL Genetic Analyzer
ILLUMINA	454 GS Junior	Illumina HiScanSQ		AB SOLiD 4hq System				AB 3730 Genetic Analyzer
ION_TORRENT		Illumina HiSeq 1000		AB SOLiD PI System				AB 3730xL Genetic Analyzer
OXFORD_NANOPORE		Illumina HiSeq 1500		AB SOLiD System
PACBIO_SMRT		Illumina HiSeq 2000		AB SOLiD System 2.0
		Illumina HiSeq 2500		AB SOLiD System 3.0
		Illumina HiSeq 3000
		Illumina HiSeq 4000
		Illumina iSeq 100
		Illumina NovaSeq 6000
		Illumina MiniSeq
		Illumina MiSeq
		NextSeq 500
		NextSeq 550
