# Supplementary material for: Compositional distinction of gut microbiota between Han Chinese and Tibetan populations with liver cirrhosis
Source: PeerJ. 2021 Sep 15;9:e12142. doi: 10.7717/peerj.12142 (PMC8449536; doi:10.7717/peerj.12142)
Supplement: Supplemental Information 25 [file peerj-09-12142-s025.xlsx]

## Sheet: Sheet4
original number	number	gender	age	heigjht	weight	BMI index	biosample ID
原始编号	编号	性别	年龄	身高	体重	BMI	biosample ID
BBCR	TLC1	1	54	169	67.5	23.63	SAMN14053719
BS	TLC2	1	39	177	79	25.22	SAMN14054047
CRWD	TLC3	1	60	175	78	25.47	SAMN14054174
CZ	TLC4	2	63	168	48	17.01	SAMN14054175
DL	TLC5	1	42	160	80	31.25	SAMN14054198
GS	TLC6	2	61	154	52.5	22.14	SAMN14054259
GSJM	TLC7	1	53	155	78.5	32.67	SAMN14054837
GSLB	TLC8	1	33	167	52	18.65	SAMN14056044
JLYM	TLC9	2	55	175	87	28.41	SAMN14056045
NJ	TLC10	1	44	168	81	28.7	SAMN14056234
NM	TLC11	1	62	175	74	24.16	SAMN14056262
NMDZ	TLC12	1	46	155	73	30.39	SAMN14056718
QDCR	TLC13	1	45	171	71	24.28	SAMN14056815
QZJC	TLC14	1	73	164	64	23.8	SAMN14056842
SB	TLC15	1	60	173	73	24.39	SAMN14056879
SN	TLC16	1	54	163	52	19.6	SAMN14056880
SZM	TLC17	2	61	185	86	25.13	SAMN14056897
s701	TLC18	1	31	180	92	28.4	SAMN14056936
silzx	TLC19	1	50	175	84.5	27.59	SAMN14056938
suolzx	TLC20	1	38	179	76	23.72	SAMN14056939
AWDZ	THC1	1	42	165	67	24.61	SAMN14056975
CRQD	THC2	1	51	165	72	26.45	SAMN14056978
DZ	THC3	2	65	168	67	23.74	SAMN14056977
DZCM	THC4	2	31	145	61	29.01	SAMN14057018
PBWD	THC5	1	47	173	70	23.39	SAMN14057020
QBQZ	THC6	2	38	172	68	22.99	SAMN14057049
QJ	THC7	1	57	173	77	25.73	SAMN14057050
QYRCM	THC8	1	49	160	82	32.03	SAMN14057051
WJQZ	THC9	2	49	175	85	27.76	SAMN14057157
ZRBM	THC10	2	58	173	61	20.38	SAMN14057156
s101	HLC1	1	56	166	60	21.77	SAMN14069767
s1101	HLC2	1	37	167	71.5	25.64	SAMN14069768
s1201	HLC3	1	42	165	89	32.69	SAMN14069769
s1301	HLC4	1	38	170	68	23.53	SAMN14069770
s1401	HLC5	1	52	176	66	21.31	SAMN14069772
s1501	HLC6	1	42	165	63	23.14	SAMN14069787
s1701	HLC7	1	52	163	74	27.85	SAMN14069788
s1801	HLC8	1	61	178	71	22.41	SAMN14069789
s201	HLC9	2	65	150	78	34.67	SAMN14069790
s301	HLC10	1	42	170	82	28.37	SAMN14069791
s401	HLC11	1	59	178	62	19.57	SAMN14069792
s501	HLC12	1	57	170	55	19	SAMN14069797
s601	HLC13	1	45	170	82	28.37	SAMN14069798
s801	HLC14	2	68	160	56	21.88	SAMN14069799
s901	HLC15	2	34	168	67	23.74	SAMN14069800
s1001	HLC16	1	37	165	60	22.04	SAMN14069801
sA	HHC1	1	69	172	62	20.96	SAMN14069802
sB	HHC2	2	59	160	80	31.25	SAMN14069803
sC	HHC3	1	38	175	74	24.16	SAMN14069814
sD	HHC4	1	65	174	68	22.46	SAMN14069815
sE	HHC5	2	58	167	69.5	24.92	SAMN14069816
sF	HHC6	2	58	169	85	29.76	SAMN14069817
sG	HHC7	2	54	173	88	29.4	SAMN14069818
sH	HHC8	1	18	168	65	23.03	SAMN14069819
sI	HHC9	1	43	176	74	23.89	SAMN14069820

## Sheet: Sheet1
分组1=藏族肝硬化 2=藏族对照 3=汉族肝硬化 4=汉族 对照	姓名	性别	年龄	身高	体重	BMI
1	曲扎江措	1	73	164	64	23.8
1	加永拉姆	2	55	175	87	28.41
1	闹吉	1	44	168	81	28.7
1	格桑罗布	1	33	167	52	18.65
1	松布	1	60	173	73	24.39
1	次仁旺堆	1	60	175	78	25.47
1	索南	1	54	163	52	19.6
1	格桑	2	61	154	52.5	22.14
1	斯郎扎西	1	50	175	84.5	27.59
1	次珍	2	63	168	48	17.01
1	边巴次仁	1	54	169	67.5	23.63
1	巴桑	1	39	177	79	25.22
1	尼玛顿珠	1	46	155	73	30.39
1	琼达次仁	1	45	171	71	24.28
1	索朗扎西	1	38	179	76	23.72
1	尼玛	1	62	175	74	24.16
1	达拉	1	42	160	80	31.25
1	苏卓玛	2	61	185	86	25.13
1	洛桑晋美	1	53	155	78.5	32.67
1	格桑平措	1	31	180	92	28.4
2	次仁穷达	1	51	165	72	26.45
2	桑珠群措	1	42	165	67	24.61
2	多珍	2	65	168	67	23.74
2	邓增措姆	2	31	145	61	29.01
2	曲吉	1	57	173	77	25.73
2	帕巴旺堆	1	47	173	70	23.39
2	乔羊热措毛	1	49	160	82	32.03
2	吴金曲珍	2	49	175	85	27.76
2	泽仁巴姆	2	58	173	61	20.38
2	强巴曲珍	2	38	172	68	22.99
3	陈江	1	42	165	89	32.69
3	陈书俊	1	42	165	63	23.14
3	陈文晋	1	38	170	68	23.53
3	辜朝荣	1	42	170	82	28.37
3	焦生明	1	56	166	60	21.77
3	黎桂贞	2	68	160	56	21.88
3	李俊龙	1	37	167	71.5	25.64
3	李秀贵	1	52	163	74	27.85
3	刘克元	1	59	178	62	19.57
3	骆选美	2	34	168	67	23.74
3	苏久文	1	45	170	82	28.37
3	徐天成	1	52	176	66	21.31
3	杨桂英	2	65	150	78	34.67
3	余金国	1	57	170	55	19
3	喻远鑫	1	37	165	60	22.04
3	张正全	1	61	178	71	22.41
4	李果	1	18	168	65	23.03
4	尚文英	1	43	176	74	23.89
4	张炜	1	38	175	74	24.16
4	张艳玲	2	59	160	80	31.25
4	李元林	1	69	172	62	20.96
4	程宏英	1	65	174	68	22.46
4	张才蓉	2	58	167	69.5	24.92
4	王志蓉	2	58	169	85	29.76
4	祝雪茹	2	54	173	88	29.4

## Sheet: Sheet2
分组		#SampleID
藏正常	AWDZ	THC1
藏正常	CRQD	THC2
藏正常	DZ	THC3
藏正常	DZCM	THC4
藏正常	PBWD	THC5
藏正常	QBQZ	THC6
藏正常	QJ	THC7
藏正常	QYRCM	THC8
藏正常	WJQZ	THC9
藏正常	ZRBM	THC10
汉正常	sA	HHC1
汉正常	sB	HHC2
汉正常	sC	HHC3
汉正常	sD	HHC4
汉正常	sE	HHC5
汉正常	sF	HHC6
汉正常	sG	HHC7
汉正常	sH	HHC8
汉正常	sI	HHC9
藏肝硬化	BBCR	TLC1
藏肝硬化	BS	TLC2
藏肝硬化	CRWD	TLC3
藏肝硬化	CZ	TLC4
藏肝硬化	DL	TLC5
藏肝硬化	GS	TLC6
藏肝硬化	GSJM	TLC7
藏肝硬化	GSLB	TLC8
藏肝硬化	JLYM	TLC9
藏肝硬化	NJ	TLC10
藏肝硬化	NM	TLC11
藏肝硬化	NMDZ	TLC12
藏肝硬化	QDCR	TLC13
藏肝硬化	QZJC	TLC14
藏肝硬化	SB	TLC15
藏肝硬化	SN	TLC16
藏肝硬化	SZM	TLC17
藏肝硬化	s701	TLC18
藏肝硬化	silzx	TLC19
藏肝硬化	suolzx	TLC20
汉肝硬化	s101	HLC1
汉肝硬化	s1101	HLC2
汉肝硬化	s1201	HLC3
汉肝硬化	s1301	HLC4
汉肝硬化	s1401	HLC5
汉肝硬化	s1501	HLC6
汉肝硬化	s1701	HLC7
汉肝硬化	s1801	HLC8
汉肝硬化	s201	HLC9
汉肝硬化	s301	HLC10
汉肝硬化	s401	HLC11
汉肝硬化	s501	HLC12
汉肝硬化	s601	HLC13
汉肝硬化	s801	HLC14
汉肝硬化	s901	HLC15
汉肝硬化	s1001	HLC16

## Sheet: Sheet3
分组1=藏族肝硬化 2=藏族对照 3=汉族肝硬化 4=汉族 对照	姓名	原始编号	编号	性别	年龄	身高	体重	BMI
1	曲扎江措	QZJC	TLC14	1	73	164	64	23.8
1	加永拉姆	JLYM	TLC9	2	55	175	87	28.41
1	闹吉	NJ	TLC10	1	44	168	81	28.7
1	格桑罗布	GSLB	TLC8	1	33	167	52	18.65
1	松布	SB	TLC15	1	60	173	73	24.39
1	次仁旺堆	CRWD	TLC3	1	60	175	78	25.47
1	索南	SN	TLC16	1	54	163	52	19.6
1	格桑	GS	TLC6	2	61	154	52.5	22.14
1	斯郎扎西	silzx	TLC19	1	50	175	84.5	27.59
1	次珍	CZ	TLC4	2	63	168	48	17.01
1	边巴次仁	BBCR	TLC1	1	54	169	67.5	23.63
1	巴桑	BS	TLC2	1	39	177	79	25.22
1	尼玛顿珠	NMDZ	TLC12	1	46	155	73	30.39
1	琼达次仁	QDCR	TLC13	1	45	171	71	24.28
1	索朗扎西	suolzx	TLC20	1	38	179	76	23.72
1	尼玛	NM	TLC11	1	62	175	74	24.16
1	达拉	DL	TLC5	1	42	160	80	31.25
1	苏卓玛	SZM	TLC17	2	61	185	86	25.13
1	洛桑晋美	GSJM	TLC7	1	53	155	78.5	32.67
1	格桑平措	s701	TLC18	1	31	180	92	28.4
2	次仁穷达	CRQD	THC2	1	51	165	72	26.45
2	桑珠群措	AWDZ	THC1	1	42	165	67	24.61
2	多珍	DZ	THC3	2	65	168	67	23.74
2	邓增措姆	DZCM	THC4	2	31	145	61	29.01
2	曲吉	QJ	THC7	1	57	173	77	25.73
2	帕巴旺堆	PBWD	THC5	1	47	173	70	23.39
2	乔羊热措毛	QYRCM	THC8	1	49	160	82	32.03
2	吴金曲珍	WJQZ	THC9	2	49	175	85	27.76
2	泽仁巴姆	ZRBM	THC10	2	58	173	61	20.38
2	强巴曲珍	QBQZ	THC6	2	38	172	68	22.99
3	陈江	s1201	HLC3	1	42	165	89	32.69
3	陈书俊	s1501	HLC6	1	42	165	63	23.14
3	陈文晋	s1301	HLC4	1	38	170	68	23.53
3	辜朝荣	s301	HLC10	1	42	170	82	28.37
3	焦生明	s101	HLC1	1	56	166	60	21.77
3	黎桂贞	s801	HLC14	2	68	160	56	21.88
3	李俊龙	s1101	HLC2	1	37	167	71.5	25.64
3	李秀贵	s1701	HLC7	1	52	163	74	27.85
3	刘克元	s401	HLC11	1	59	178	62	19.57
3	骆选美	s901	HLC15	2	34	168	67	23.74
3	苏久文	s601	HLC13	1	45	170	82	28.37
3	徐天成	s1401	HLC5	1	52	176	66	21.31
3	杨桂英	s201	HLC9	2	65	150	78	34.67
3	余金国	s501	HLC12	1	57	170	55	19
3	喻远鑫	s1001	HLC16	1	37	165	60	22.04
3	张正全	s1801	HLC8	1	61	178	71	22.41
4	李果	sH	HHC8	1	18	168	65	23.03
4	尚文英	sI	HHC9	1	43	176	74	23.89
4	张炜	sC	HHC3	1	38	175	74	24.16
4	张艳玲	sB	HHC2	2	59	160	80	31.25
4	李元林	sA	HHC1	1	69	172	62	20.96
4	程宏英	sD	HHC4	1	65	174	68	22.46
4	张才蓉	sE	HHC5	2	58	167	69.5	24.92
4	王志蓉	sF	HHC6	2	58	169	85	29.76
4	祝雪茹	sG	HHC7	2	54	173	88	29.4
